# Supplementary material
Source: PubMed Central journal article supplement (PMC2742808)
Supplement: supp_C109.014977_jbc.C109.014977-1.pdf [file supp_C109.014977_jbc.C109.014977-1.pdf]

**Supplemental Table 1. Effect of DNA substrates on nucleotide binding affinity of MutS $\beta$ .** Binding of ATP or ADP to the MSH2 and MSH3 subunits of MutS $\beta$  was determined by UV cross-linking analysis as described in Experimental Procedures. MutS $\beta$  was incubated with [ $\alpha$ - $^{32}$ P]-ATP or [ $\alpha$ - $^{32}$ P]-ADP on ice for 10 min, subjected to 10 min UV cross-linking, followed immediately by fractionation in 8% SDS-PAGE gels. Radiolabeled bands were detected and quantified using a Phosphor Imager (Molecular Dynamics). Data presented in this Table were derived from gels shown in Fig. 3B (ATP binding) and Fig. 3C (ADP binding). Relative binding affinity was calculated by dividing the  $^{32}$ P intensity of individual MSH2 or MSH3 subunits with that of the same subunit in non-DNA-containing reactions and multiplying by 100. N.D., not determined; UD, undetectable.

| Nucleotide | Subunit | - Mg $^{2+}$ |      |     |     |     | + Mg $^{2+}$ |      |     |     |     |
|------------|---------|--------------|------|-----|-----|-----|--------------|------|-----|-----|-----|
|            |         | - DNA        | Homo | ID  | CAG | CTG | - DNA        | Homo | ID  | CAG | CTG |
| ATP        | MSH3    | 100          | N.D. | 39  | 40  | 39  | 100          | N.D. | 230 | 216 | 200 |
|            | MSH2    | 100          | N.D. | 42  | 42  | 43  | 100          | N.D. | 340 | 329 | 320 |
| ADP        | MSH3    | UD           | UD   | UD  | UD  | UD  | 100          | 60   | 62  | 67  | 63  |
|            | MSH2    | 100          | 106  | 104 | 96  | 98  | 100          | 83   | 82  | 86  | 84  |
